# Supplementary material
Source: PubMed Central journal article supplement (PMC3210314)
Supplement: auto0709_0993SD1.pdf [file auto0709_0993SD1.pdf]

# Supplemental Figure S1

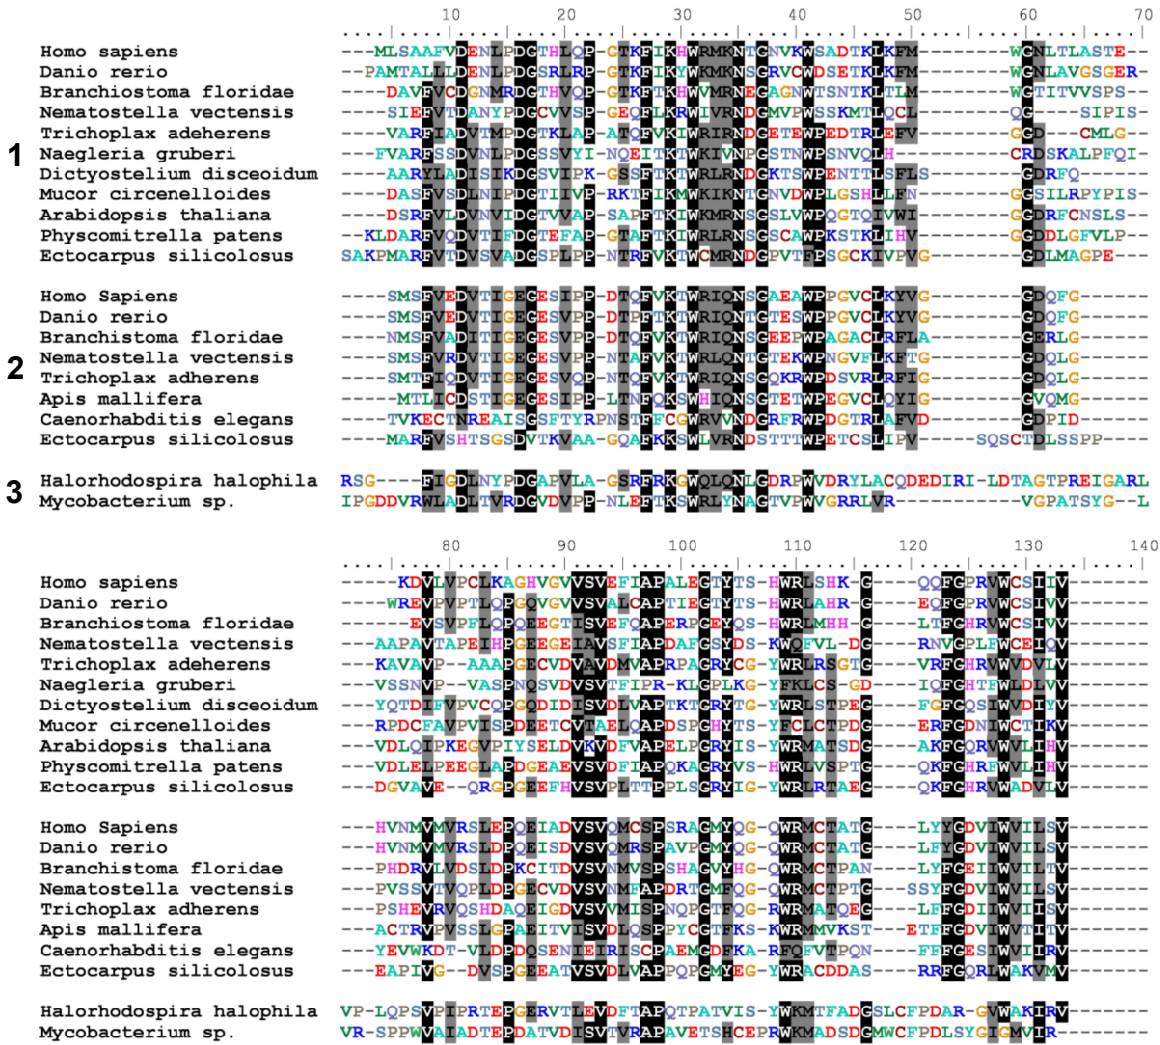

# Supplemental Figure S2

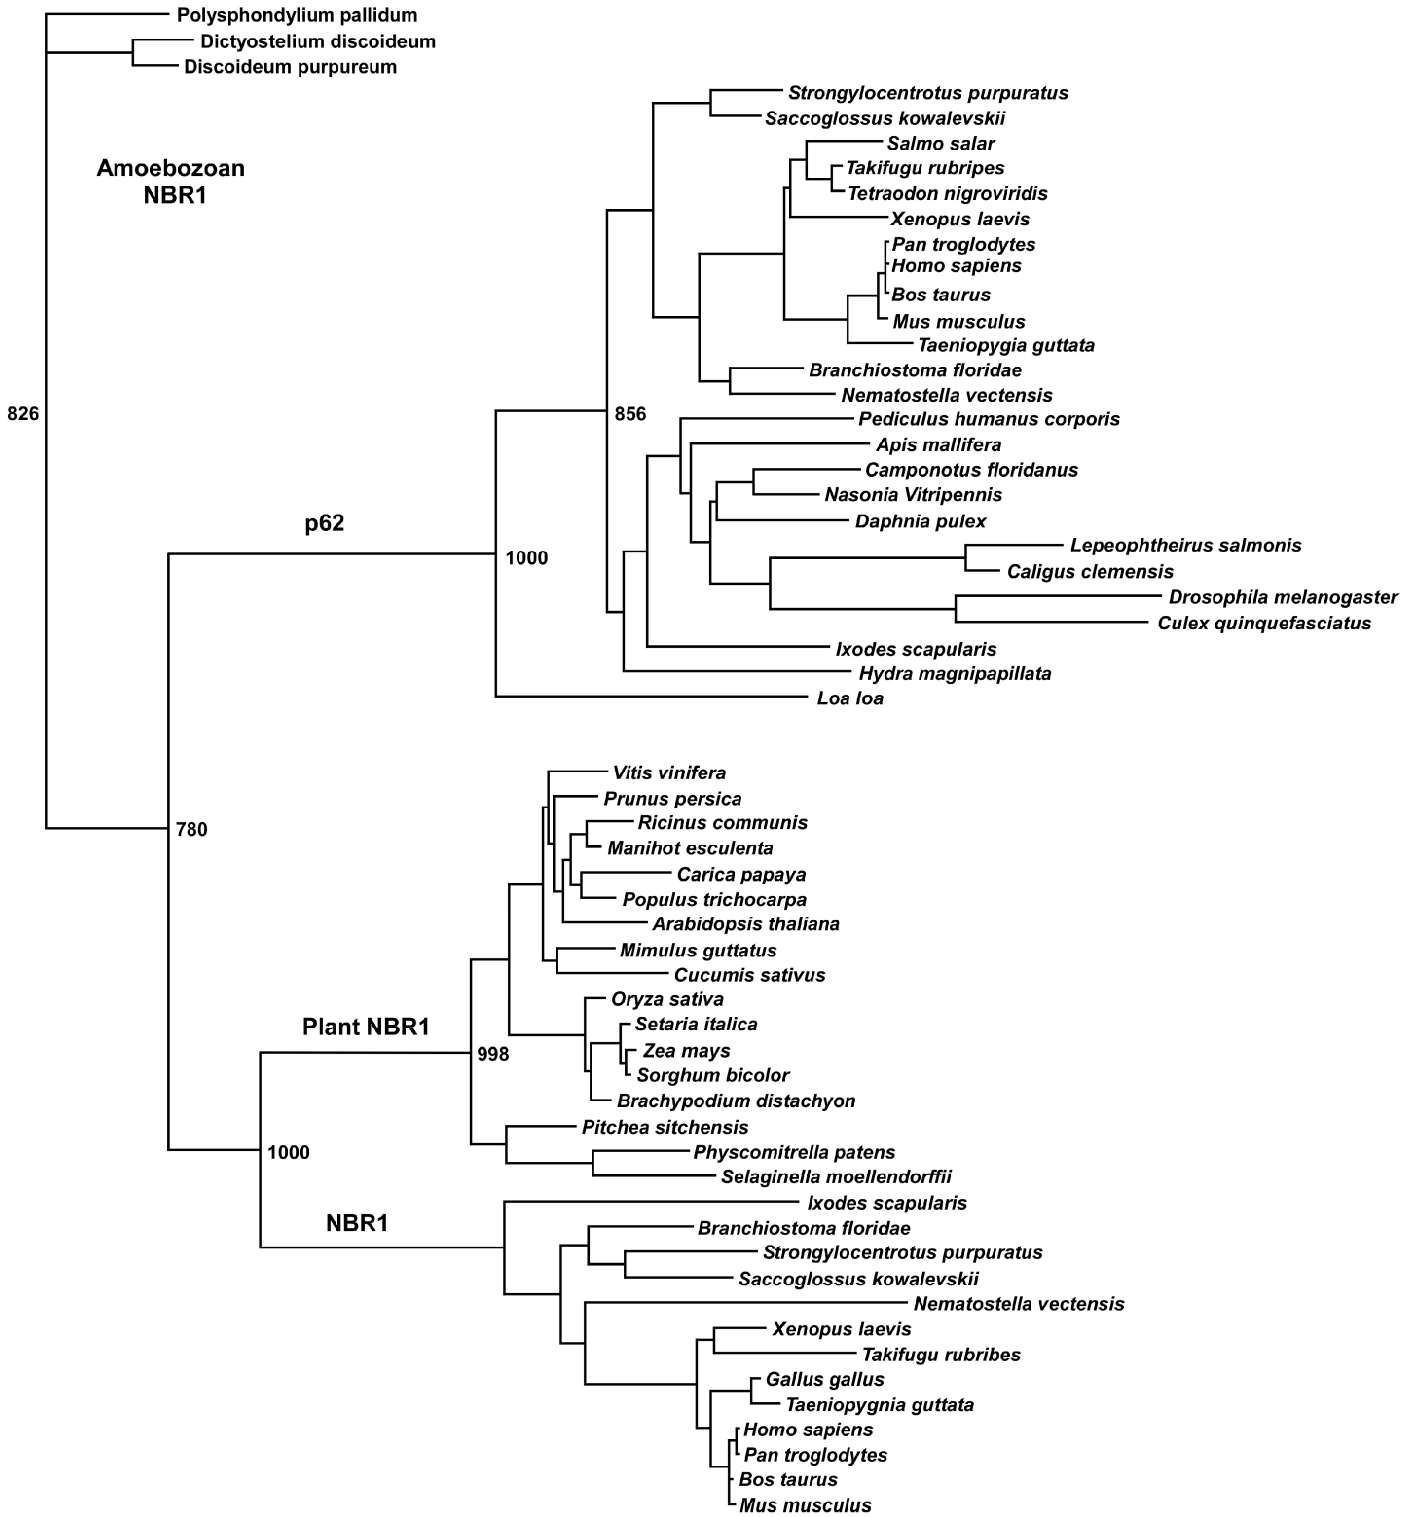

# Supplemental Figure S3

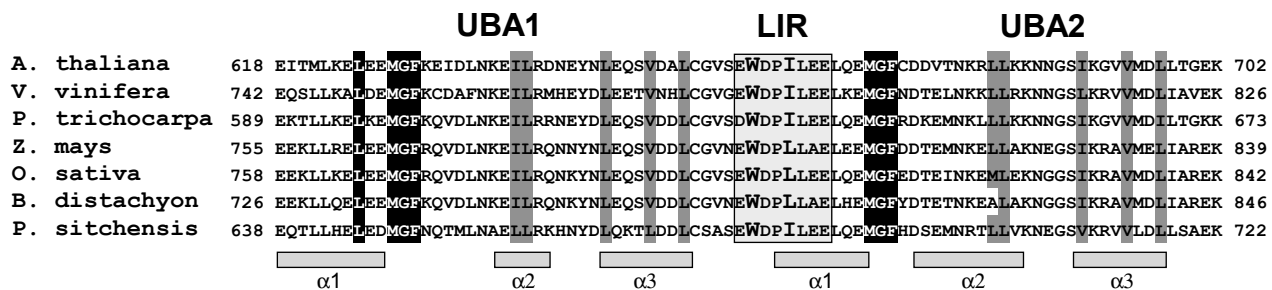

**Supplementary Figure 1.** Multiple sequence alignment of FW domain sequences using ClustalW from (1) NBR1 homologs, (2) homologs of mammalian MGC4614, and (3) two bacterial proteins. The threshold for identity/similarity shading was set to 60%.

**Supplementary Figure 2.** Phylogenetic tree of NBR1- and p62 homologous amino acid sequences from metazoa, plants and amoebzoa constructed using the maximum likelihood method. The tree was produced using a Clustal W multiple alignment of conserved domains, PB1, ZZ, FW and UBA. Aligned sequences were analysed using phyML (maximum likelihood) with a bootstrap value of 1000. The tree has been rooted in the shared branch leading to amoebzoan homologs of NBR1. Essentially similar results were obtained when the FW domain sequences were excluded in the tree construction.

**Supplementary Figure 3.** Sequence alignment of the twin UBA domains and LIR of NBR1-homologs from higher plants. Conserved hydrophobic residues are indicated in grey for similar and black for identical residues. Grey boxes indicate the approximate localization of  $\alpha$ -helices. The conserved LIR-motif is indicated.

**Supplementary Table 1.** Protein accession numbers for proteins used in Fig.1 and Supplemental Fig. S2.

| Species                         | Homology     | Accession number             | Database                    |
|---------------------------------|--------------|------------------------------|-----------------------------|
| <i>Arabidopsis thaliana</i>     | NBR1-like    | Q9SB64                       | NCBI                        |
| <i>Apis mellifera</i>           | p62-like     | XP_392222.2                  | NCBI                        |
| <i>Brachypodium distachyon</i>  | NBR1-like    | Bradi3g47580.1               | Phytozome                   |
| <i>Branchiostoma floridae</i>   | NBR1-like    | XP_002586952.1               | NCBI                        |
|                                 | p62-like     | XP_002611408.1               | NCBI                        |
| <i>Bos taurus</i>               | NBR1-like    | NP_001093837.1               | NCBI                        |
|                                 | p62-like     | NP_788814.1                  | NCBI                        |
| <i>Caenorhabditis elegans</i>   | p62-like     | NP_502280.2                  | NCBI                        |
| <i>Caligus clemensi</i>         | p62-like     | ACO15675                     | NCBI                        |
| <i>Camponotus floridanus</i>    | p62-like     | EFN70930.1                   | NCBI                        |
| <i>Capsaspora owczarzaki</i>    | NBR1-like    | CAOG_01026                   | Origins of multicellularity |
| <i>Carica Papaya</i>            | NBR1-like    | evm.model.supercontig_159.27 | Phytozome                   |
| <i>Ciona intestinalis</i>       | NBR1-like    | XP_002120066.1               | NCBI                        |
|                                 | p62-like     | XP_002128445.1               | NCBI                        |
| <i>Cryptococcus neoformans</i>  | NBR1-like    | XP_570947.1                  | NCBI                        |
| <i>Cucumis sativus</i>          | NBR1-like    | Cucsa.098760                 | Phytozome                   |
| <i>Culex quinquefasciatus</i>   | p62-like     | XP_001862557.1               | NCBI                        |
| <i>Daphnia pulex</i>            | p62-like     | Dappu1 226413                | JGI                         |
| <i>Dictyostelium discoideum</i> | NBR1-like    | XP_646538.1                  | NCBI                        |
| <i>Discoideum purpureum</i>     | NBR1-like    | Dicpu1 91584                 | JGI                         |
| <i>Drosophila melanogaster</i>  | p62-like     | NP_476700.1                  | NCBI                        |
| <i>Ectocarpus siliculosus</i>   | NBR1-like    | CBJ31307.1                   | NCBI                        |
| <i>Gallus gallus</i>            | NBR1-like    | XP_418128.2                  | NCBI                        |
|                                 | p62-like     | XP_001233249.1               | NCBI                        |
| <i>Homo sapiens</i>             | NBR1         | Q14596.3                     | NCBI                        |
|                                 | p62-like     | Q13501.1                     | NCBI                        |
| <i>Hydra magnipapillata</i>     | p62-like     | XP_002169119.1               | NCBI                        |
| <i>Ixodes scapularis</i>        | NBR1-like    | XP_002413442.1               | NCBI                        |
|                                 | p62-like     | XP_002433496.1               | NCBI                        |
| <i>Lepeophtheirus salmonis</i>  | p62-like     | ACO12440.1                   | NCBI                        |
| <i>Loa Loa</i>                  | p62-like     | EFO27080.1                   | NCBI                        |
| <i>Manihot esculenta</i>        | NBR1-like    | cassava4.1_002227m           | Phytozome                   |
| <i>Mimulus guttatus</i>         | NBR1-like    | gene mgv1a001599m.g          | Phytozome                   |
| <i>Monosiga brevicollis</i>     | NBR1-like    | XP_001742207.1               | NCBI                        |
| <i>Mucor circinelloides</i>     | NBR1-like    | Mucci1 83756                 | JGI                         |
| <i>Mus musculus</i>             | NBR1-like    | CAM21031.1                   | NCBI                        |
|                                 | p62-like     | NP_035148.1                  | NCBI                        |
| <i>Nasonia vitripennis</i>      | p62-like     | XP_001608187.1               | NCBI                        |
| <i>Naegleria gruberi</i>        | p62-like (1) | XP_002682462.1               | NCBI                        |
|                                 | p62-like (2) | XP_002672654.1               | NCBI                        |
|                                 | NBR1-like    | XP_002678176.1               | NCBI                        |
| <i>Nematostella vectensis</i>   | NBR1-like    | XP_001634545.1               | NCBI                        |

|                                      |           |                     |                             |
|--------------------------------------|-----------|---------------------|-----------------------------|
|                                      | p62-like  | XP_001639077.1      | NCBI                        |
| <i>Oryza sativa</i>                  | NBR1-like | NP_001047302.1      | NCBI                        |
| Pan troglodytes                      | NBR1-like | XP_001155284.1      | NCBI                        |
|                                      | p62-like  | XP_518154.2         | NCBI                        |
| <i>Pediculus humanis corporis</i>    | p62-like  | XP_002428257.1      | NCBI                        |
| <i>Physcomitrella patens</i>         | NBR1-like | XP_001765979.1      | NCBI                        |
| <i>Phytophthora infestans</i>        | NBR1-like | XP_002908994        | NCBI                        |
|                                      | p62-like  | XP_002908993.1      | NCBI                        |
| <i>Picea sitchensis</i>              | NBR1-like | ACN39846.1          | NCBI                        |
| <i>Polysphondylium pallidum</i>      | NBR1-like | EFA82588.1          | NCBI                        |
| <i>Populus triochoarpa</i>           | NBR1-like | XP_002321635.1      | NCBI                        |
| <i>Prunus persica</i>                | NBR1-like | ppa001688m          | Phytozome                   |
| <i>Ricinus communis</i>              | NBR1-like | XP_002511320.1      | NCBI                        |
| <i>Saccoglossus kowalevskii</i>      | NBR1-like | XP_002736671.1      | NCBI                        |
|                                      | p62-like  | XP_002737463.1      | NCBI                        |
| <i>Salmo salar</i>                   | p62-like  | NP_001133813.1      | NCBI                        |
| <i>Selaginella moellendorffii</i>    | NBR1-like | XP_002993381.1      | NCBI                        |
| <i>Setaria italica</i>               | NBR1-like | SiPROV002006m       | Phytozome                   |
| <i>Sorghum bicolor</i>               | NBR1-like | XP_002454107.1      | NCBI                        |
| <i>Strongylocentrotus purpuratus</i> | NBR1-like | XP_791508.1         | NCBI                        |
|                                      | p62-like  | XP_795534.1         | NCBI                        |
| <i>Taeniopygia guttata</i>           | p62-like  | XP_002195682.1      | NCBI                        |
|                                      | NBR1-like | XP_002195327.1      | NCBI                        |
| <i>Takifugu rubripes</i>             | NBR1-like | e_gw2.41.45.1       | JGI                         |
|                                      | p62-like  | ESTEXT_GW.C_7170008 | JGI                         |
| <i>Tetradon nigroviridis</i>         | p62-like  | CAF90222.1          | NCBI                        |
| <i>Thecamonas traherens</i>          | NBR1-like | AMSG_01102          | Origins of multicellularity |
| <i>Trichoplax adhaerens</i>          | NBR1-like | XP_002110305.1      | NCBI                        |
|                                      | p62-like  | XP_002114993.1      | NCBI                        |
| <i>Triticum aestivum</i>             | NBR1-like | ABB18390.1          | NCBI                        |
| <i>Vitis vinifera</i>                | NBR1-like | CBI14950.3          | NCBI                        |
| <i>Xenopus laevis</i>                | NBR1-like | NP_001079967.1      | NCBI                        |
|                                      | p62-like  | NP_001079920.1      | NCBI                        |
| <i>Zea mays</i>                      | NBR1-like | ACN33320.1          | NCBI                        |
